# Supplementary material for: The Escalating Effects of Wildlife Tourism on Human–Wildlife Conflict
Source: MDPI journal article supplement (doi:10.3390/ani11051378), 2021-05-12
Supplement: s1 [file s1]

## Supplementary Materials

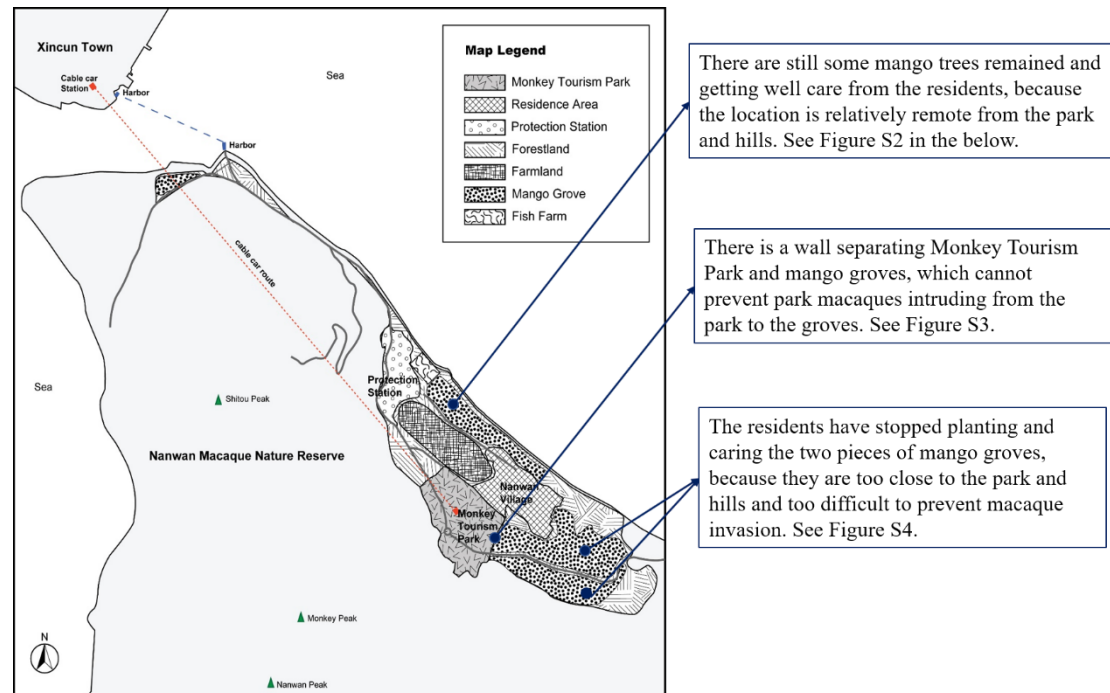

Figure S1. A photographic illustration of the community-macaque conflict

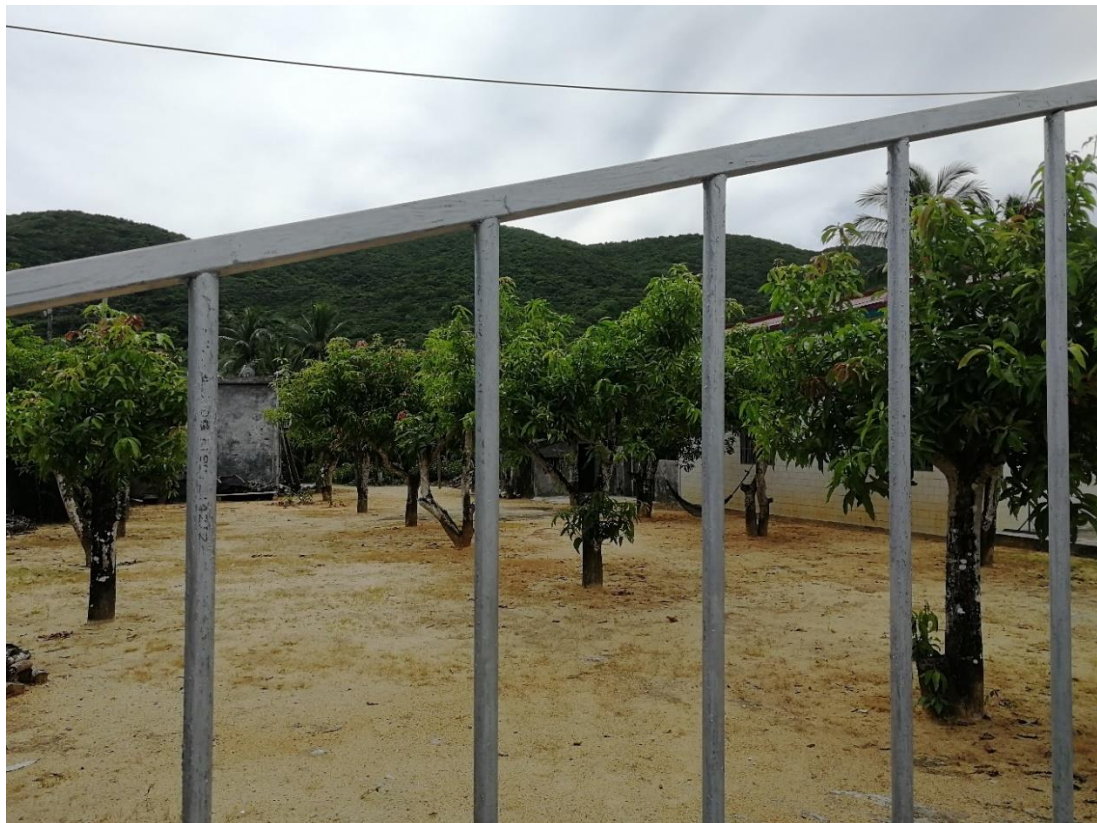

Figure S2. Well-cared mango groves in a relatively remote place from the monkey park and reserve hills



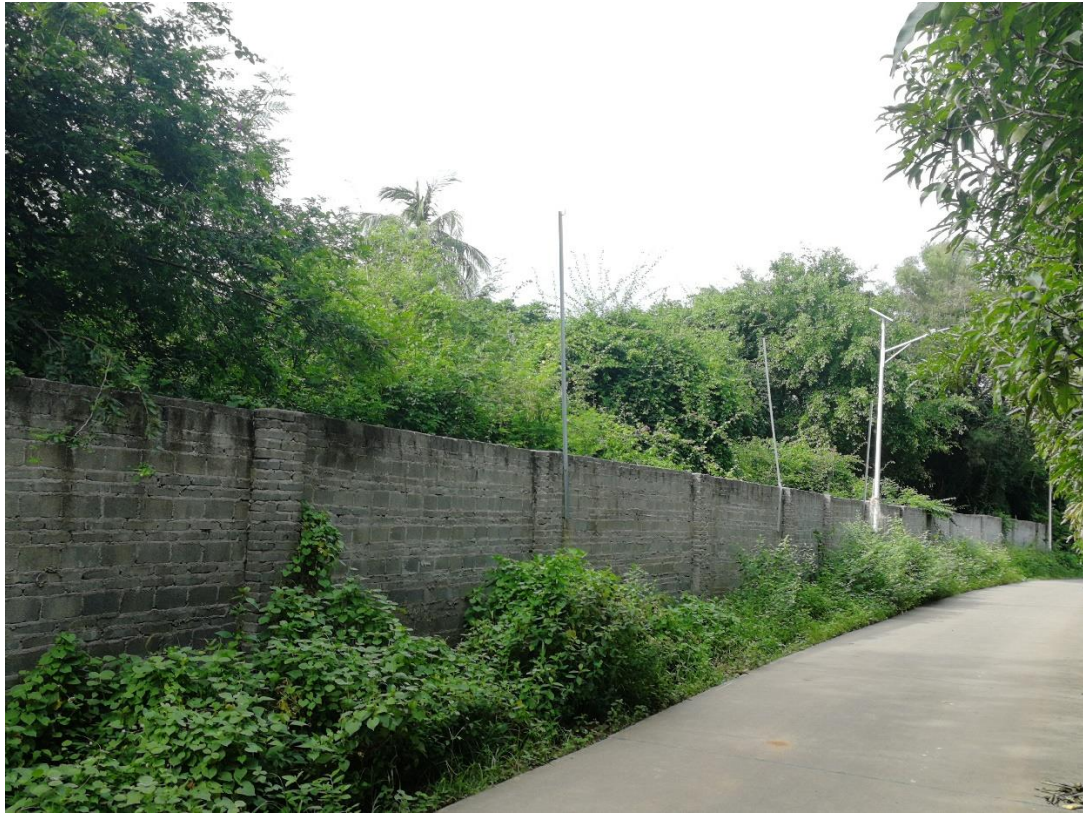

**Figure S3. The wall between the monkey park and mango groves**

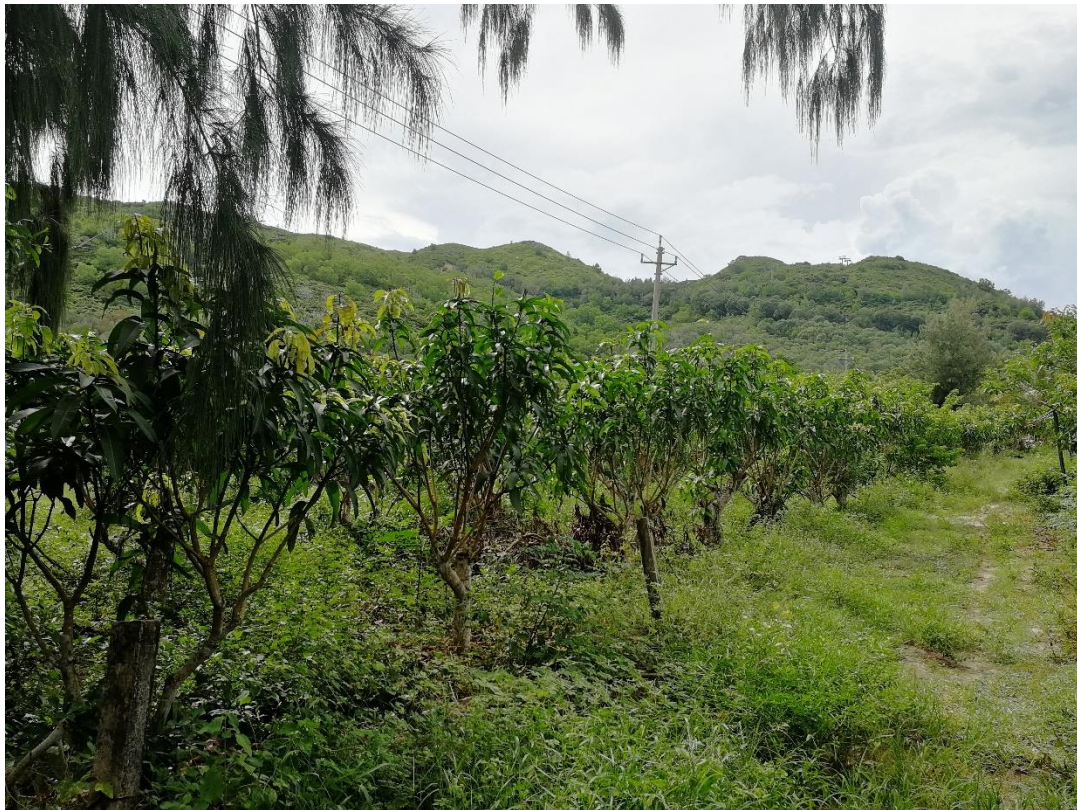

**Figure S4. The abandoned mango groves beside the monkey park and reserve hills**

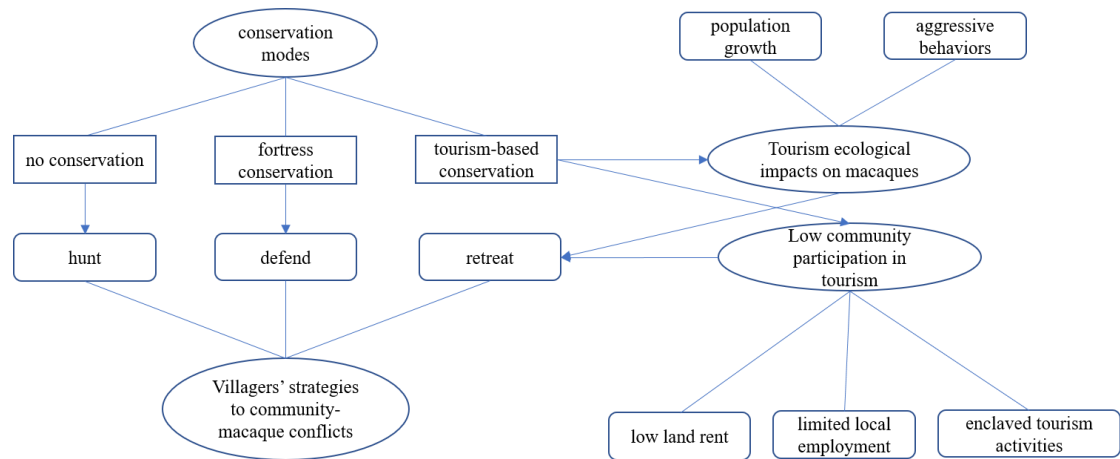

**Figure S5. The thematic map showing the (sub)themes from thematic analysis**
